## ***Tsc1* haploinsufficiency leads to *Pax2* dysregulation in the developing murine cerebellum**

Ines Serra<sup>1,#</sup>, Ana Stravs<sup>1,2#</sup>, Catarina Osório<sup>1</sup>, Maria Roa Oyaga<sup>1</sup>, Martijn Schonewille<sup>1</sup>,  
Christian Tudorache<sup>2</sup>, Aleksandra Badura<sup>1</sup>

<sup>1</sup> Department of Neuroscience, Erasmus MC, Rotterdam, 3015 CN, The Netherlands

<sup>2</sup> Institute of Biology Leiden, Leiden University, Leiden, 2333 BE, The Netherlands

# These authors contributed equally to this work.

### **Correspondence:**

Aleksandra Badura ([a.badura@erasmusmc.nl](mailto:a.badura@erasmusmc.nl))

Department of Neuroscience, Erasmus MC

Wytemaweg 80, 3015 CN Rotterdam

tel: 0031-(0)10 704 35 89

## 1 **Abstract**

2 Tuberos sclerosis complex 1 (*TSC1*) is a tumour suppressor gene that inhibits the mechanistic  
3 target of rapamycin (mTOR) pathway. Mutations in *TSC1* lead to a rare complex disorder of  
4 the same name, in which up to 50% of patients present with autism spectrum disorder (ASD).  
5 ASD is a highly prevalent, early-onset neurodevelopmental disorder, characterized by social  
6 deficits and repetitive behaviours, although the type and severity of symptoms show wide  
7 variability across individuals. Amongst different brain areas proposed to play a role in the  
8 development of ASD, the cerebellum is commonly reported to be altered, and cerebellar-  
9 specific deletion of *Tsc1* in mice is sufficient to induce an ASD-like phenotype. Given that the  
10 mTOR pathway is crucial for proper cell replication and migration, this suggests that  
11 dysregulation of this pathway, particularly during critical phases of cerebellar development,  
12 could contribute to the establishment of ASD.

13 Here, we used a mouse model of TSC to investigate gene and protein expression during  
14 embryonic and early postnatal periods of cerebellar development. We found that, at E18 and  
15 P7, mRNA levels of the cerebellar inhibitory interneuron marker *Pax2* were dysregulated. This  
16 was accompanied by changes in the expression of mTOR pathway-related genes and  
17 downstream phosphorylation of S6. Differential gene correlation analysis revealed dynamic  
18 changes in correlated gene pairs across development, with an overall loss of correlation  
19 between mTOR- and cerebellar-related genes in *Tsc1* mutants compared to controls. We  
20 corroborated the genetic findings by characterizing the mTOR pathway and cerebellar  
21 development on protein and cellular levels with Western blot and immunohistochemistry. We  
22 found that *Pax2*-expressing cells were hypertrophic at E18 while, at P7, their number was  
23 increased and maturation into parvalbumin-expressing cells delayed. Our findings indicate that  
24 E18 and P7 are crucial time points in cerebellar development in mice that are particularly  
25 susceptible to mTOR pathway dysregulation.

26 **Manuscript contribution to the field**

27 ASD is one of the most prevalent neurodevelopmental disorders, however little is known about  
28 the shared mechanisms underlying its aetiology. At the anatomical level, the cerebellum has  
29 been identified as one of the key structures involved in the development of ASD, whereas at  
30 the molecular level, mutations in the mTOR signalling pathway, essential for cell growth and  
31 proliferation, carry a high genetic risk for this disorder. We used a haploinsufficient tuberous  
32 sclerosis complex 1 (*Tsc1*) mouse model to investigate the effects of mTOR overactivation in  
33 the developing cerebellum. *Tsc1* inhibits the mTOR pathway, and mice with cerebellar-specific  
34 deletion of *Tsc1* have been shown to harbour an ASD-like phenotype. We found that Pax2  
35 expression in the cerebellum is dysregulated at prenatal and early postnatal time points, leading  
36 to a delayed maturation of inhibitory interneurons. Our findings indicate that mTOR  
37 overactivity in the cerebellum selectively affects the development of cerebellar interneurons.  
38 This finding is in line with other studies, which found decreased numbers of inhibitory  
39 interneurons in other models of ASD. Therefore, deficits in the maturation of the inhibitory  
40 signalling could be one of the mechanisms integrating high-risk mutations that underlie ASD  
41 aetiology.

42

43

44

45

46

47

48

49

50

51

52

## 53 **Introduction**

54 The mechanistic target of rapamycin (mTOR) pathway is a highly complex, conserved and  
55 ubiquitous signalling avenue involved in biomass synthesis, growth and cell proliferation (1).  
56 Specifically during brain development, it has been proposed that a tight regulation of mTOR  
57 signalling is required for sustaining cell cycle length and re-entry, defining pluripotency status  
58 and triggering differentiation (2–4). However, how the mTOR pathway affects distinct lineages  
59 of differentiating cells is still largely unexplored. Supporting a crucial role for the mTOR  
60 signalling in brain development, mutations along this pathway frequently lead to complex  
61 monogenic neurodevelopmental disorders (also known as *mTORopathies*), characterized by  
62 heterogeneous neuropsychiatric phenotypes that include megalencephaly, epilepsy, intellectual  
63 disability and autism spectrum disorder (ASD) (5,6).

64 The prototypical mTORopathy is tuberous sclerosis complex (TSC), a rare autosomal  
65 dominant disorder affecting 1 in 6000 people, that arises from heterozygous mutations in the  
66 *TSC1* or *TSC2* genes (7,8). As *TSC1* and 2, together with *TBC1D7*, form a tumour suppressor  
67 complex upstream of mTOR, loss of function of this complex leads to mTOR pathway  
68 overactivity (9,10). mTOR can be organized in two complexes, mTORC1 and mTORC2,  
69 characterized, among others, by the presence of Raptor and Rictor, respectively (11,12). While  
70 mTORC1 is primarily associated with growth and proliferation, mTORC2 regulates  
71 cytoskeleton organization and cell motility (13,14). Nonetheless, crosstalk between mTORC1  
72 and mTORC2 is vast, and changes in the function of both complexes due to mTOR dysfunction  
73 were shown to alter dendritic arbour morphology and synaptic transmission (15). On the whole,  
74 the effects of mTOR overactivity in TSC patients lead to a multi-system phenotype that  
75 includes widespread hamartoma growth, high prevalence of epilepsy, and, in up to 50% of the  
76 patients, ASD (16,17).

77 ASD is characterized by deficits in social communication and interaction, and by the  
78 presence of restricted, repetitive, and inflexible behaviours (18). The World Health  
79 Organization (WHO) estimates that 1 in 160 children worldwide will present with ASD,  
80 although its prevalence is known to vary across nations (19). Despite this high prevalence, little  
81 is known about the molecular mechanisms that underlie ASD. This is due to a significant  
82 knowledge gap, particularly with respect to brain development, when even limited signalling  
83 alterations can translate into considerable brain function, connectivity and structural deficits  
84 (20–22). While there is no single major anatomical abnormality evident in all people with ASD,  
85 the cerebellum is a brain structure that has emerged as a significant putative contributor to the  
86 development of ASD phenotypes. In humans, damage to the cerebellum is the second largest  
87 factor contributing to the risk of developing ASD (23–25), while cerebello-cortical  
88 connectivity is often found to be impaired in people with ASD (26,27). In recent years, several  
89 studies showed that murine models with cerebellar-specific deletion or inactivation of genes  
90 affecting the mTOR pathway, replicate these human phenotypes, presenting with decreased  
91 social interaction, increased repetitive behaviours and inflexible learning (28–31). Together  
92 with the fact that many mTOR pathway genes are found to be enriched in the cerebellum  
93 (32,33), this suggests that this brain area may be particularly sensitive to changes in mTOR  
94 pathway regulation.

95 Here, we used a haploinsufficient *Tsc1* mouse model, mimicking the human genotype  
96 of TSC, to investigate the effects of TSC1 deficiency in the developing cerebellum. We found  
97 that genetic dysregulation of the mTOR pathway can be detected from E18, suggesting a  
98 compensatory down-regulation in response to the hyperactivity of this pathway. Changes to  
99 cerebellar development can also be found at this age and postnatally at P7. Specifically, we  
100 found that Pax2 expression at these time points is altered, indicative of a delay in its expression  
101 in *Tsc1*<sup>+/-</sup> mice. This culminated in slowed maturation and reduced parvalbumin expression.

102 Overall, our data suggest that mTOR overactivity in the cerebellum preferentially affects the  
103 development of cerebellar interneurons, which could potentially promote the development of  
104 altered circuitry and, consequently, lead to behavioural deficits.

105

106

107

108

109

110

111

112

113

114

115

116

117

118

119

120

121

122

123

124

125

126

## 127 **Materials and Methods**

### 128 *Mouse procedures*

129 Timed pregnancies were established between wild-type C57BL/6 females (*Tsc1*<sup>+/+</sup>) (Charles  
130 River Laboratories) and *Tsc1*<sup>tm1Djk</sup> (*Tsc1*<sup>+/-</sup>) males to obtain mixed *Tsc1*<sup>+/+</sup> and *Tsc1*<sup>+/-</sup> litters  
131 (34). Vaginal plugs were checked daily, and embryonic day 0 (E0) was defined when a plug  
132 was observed. Confirmed pregnant dams were individually housed. Mice were maintained on  
133 a standard 12h light/dark cycle, with access to food and water *ad libitum*.

134 For the collection of embryonic samples, pregnant dams were briefly anesthetized prior  
135 to cervical dislocation, and E15 (n = 8 mice per genotype) and E18 (n = 6 mice per genotype)  
136 embryos collected onto cold PBS on ice. For the collection of neonatal samples, P1 (n = 8 mice  
137 per genotype) and P7 (n = 8 mice per genotype) mice were anesthetized prior to decapitation.

138 Cerebellar tissue was dissected in cold PBS under a Zeiss Stemi SV6 Stereo  
139 microscope. qPCR and western blot samples were collected into TRI Reagent<sup>®</sup> (T9424, Sigma)  
140 or dry ice, respectively, and kept at -80°C until used.

141 All experimental animal procedures were approved *a priori* by an independent animal  
142 ethical committee (DEC-Consult, Soest, The Netherlands), as required by Dutch law, and  
143 conform to the relevant institutional regulations of the Erasmus MC and Dutch legislation on  
144 animal experimentation.

145

### 146 *Real-time qPCR*

#### 147 *Primer design*

148 Seven genes of interest along the TSC-mTOR pathway (*Tsc1*, *Tsc2*, *Rictor*, *Rptor*, *Mtor*,  
149 *Rps6kb1* and *Rps6*) (1) and 5 genes representing distinct cerebellar lineages (*Pax2*, *Pax6*,  
150 *Calb1*, *Slc1a3* and *Gdf10*) (35) were targeted. Housekeeping genes were selected based on  
151 previous literature using embryonic and neonatal mouse brain tissue (36–38). Two

152 housekeeping genes were selected per age: *Ywhaz* and *Sdha* were used for the E15 group, *Gusb*  
153 and *Sdha* for E18, and *Gusb* and *Ywhaz* for P1 and P7.

154 Primer pairs were adapted from literature or designed using *Primer-BLAST*  
155 ([ncbi.nlm.nih.gov/tools/primer-blast](https://ncbi.nlm.nih.gov/tools/primer-blast)) and *Ensembl* ([m.ensembl.org](https://m.ensembl.org)) (Table 1).



| Targeted gene                                                                                                                                                      | Primer: Forward sequence                     | Primer: Reverse sequence |
|--------------------------------------------------------------------------------------------------------------------------------------------------------------------|----------------------------------------------|--------------------------|
| <b>qPCR</b>                                                                                                                                                        |                                              |                          |
| <i>Calb1</i>                                                                                                                                                       | TCTGGCTTCATTTTCGACGCTG                       | ACAAAGGATTTTCATTTCCGGTGA |
| <i>Gdf10</i>                                                                                                                                                       | CAGGACATGGTCGCTATCCAC                        | ACAGGCTTTTGGTCGATCATTTC  |
| <i>Gusb</i>                                                                                                                                                        | CACACTGACCCCTCATAACC                         | TGCAGTCCCGCATAGTTGAA     |
| <i>Mtor</i>                                                                                                                                                        | CACCAGAATTGGCAGATTTGC                        | CTTGGACGCCATTTCATGAC     |
| <i>Pax2</i>                                                                                                                                                        | AAGCCCGGAGTGATTGGTG                          | CAGGCGAACATAGTCGGGTT     |
| <i>Pax6</i>                                                                                                                                                        | TACCAGTGTCTACCAGCCAAT                        | TGCACGAGTATGAGGAGGTCT    |
| <i>Rptor</i>                                                                                                                                                       | CAGTCGCCTCTTATGGGACTC                        | GGAGCCTTCGATTTTCTCACA    |
| <i>Rictor</i>                                                                                                                                                      | ACAGTTGGAAAAGTGGCACAA                        | GCGACGAACGTAGTTATCACCA   |
| <i>Rps6kb1</i>                                                                                                                                                     | AGCCCTGATGACTCCACTCT                         | CTGACAGGTGTTTCGTGGACT    |
| <i>Rsp6</i>                                                                                                                                                        | CTGGGTAAAGCGGAAGTCGG                         | CCACCTCGATGAGCTTCTGA     |
| <i>Sdha</i>                                                                                                                                                        | GGAACACTCCAAAAACAGACCT                       | CCACCACTGGGTATTGAGTAGAA  |
| <i>Slc1a3</i>                                                                                                                                                      | CCGACCGTATAAAATGAGCTACC                      | ATTCCTGTGACGAGACTGGAG    |
| <i>Tsc1</i>                                                                                                                                                        | CGGCTCTGGAGGAACACAAT                         | GCTGACTGTATCGGGCTTGT     |
| <i>Tsc2</i>                                                                                                                                                        | AGTTCTCACCTTATTGAAGGCCA                      | CATTGGAGGGGTAGTCCTTGA    |
| <i>Ywhaz</i>                                                                                                                                                       | GAAAAGTTCTTGATCCCCAATGC                      | TGTGACTGGTCCACAATTCCTT   |
| <b>Genotyping</b>                                                                                                                                                  |                                              |                          |
| <i>Tsc1</i>                                                                                                                                                        | GTCACGACCGTAGGAGAAGC<br>AGGAGGCCTCTTCTGCTACC | GAATCAACCCACAGAGCAT      |
| <b>Table 1: Primer sequences.</b> Overview of genes and primer pairs used for quantitative real time PCR and genotyping of WT and <i>Tsc1</i> <sup>+/-</sup> mice. |                                              |                          |

156 Primers were validated for their specificity *in silico* using *UCSC In-Silico PCR*  
157 ([genome.ucsc.edu/cgi-bin/hgPcr](http://genome.ucsc.edu/cgi-bin/hgPcr)), *PrimerBank* ([pga.mgh.harvard.edu/primerbank](http://pga.mgh.harvard.edu/primerbank)) and *blastn*  
158 ([blast.ncbi.nlm.nih.gov](http://blast.ncbi.nlm.nih.gov)), and *in vitro* with conventional PCR and melt curve analysis.

159

#### 160 *RNA extraction*

161 Following cerebellar dissection, RNA was isolated using a standard chloroform/isopropanol  
162 method (39). In brief, tissue in TRI Reagent<sup>®</sup> (T9424, Sigma) was thawed, homogenized by  
163 syringe aspiration (G23 and G25) and vortexed. Chloroform (1:5) was added to the sample,  
164 followed by a 5-minute incubation at room temperature (RT). Samples were then centrifuged  
165 at 10 800 g, at 4°C for 15 min. The aqueous phase was collected and a 1:1 ratio of isopropanol  
166 was added. Samples were centrifuged for 10 min at maximum speed (~20 000 g). The obtained  
167 RNA pellet was washed twice with 70% ethanol, air-dried, resuspended in 20 µL of RNase-  
168 free water (UltraPure<sup>™</sup> DNase/RNase-Free Distilled Water, 10977-035, Invitrogen), and  
169 quantified with NanoDrop (Thermo Scientific).

170

#### 171 *RT-qPCR*

172 RNA was transcribed using qScript<sup>®</sup> cDNA SuperMix (Quantabio, 95048-100), according to  
173 manufacturer's instructions. RT-qPCR was performed with PerfeCTa<sup>®</sup> SYBR<sup>®</sup> Green  
174 FastMix<sup>®</sup> (Quantabio, 95072-05K) following manufacturer's instructions, with 10 µM of  
175 forward and reverse primers, and 1 µL cDNA (diluted 1:5). All samples were processed in  
176 duplicates. RT-qPCR was performed in a CFX96<sup>™</sup> Real-Time PCR detection system (Bio-  
177 Rad), with initial denaturation for 1 min at 95°C, followed by 40 cycles of 5 s at 95°C, and 15  
178 s at 55°C, with melting curve generation.

179

180

181 *Raw data processing*

182 Relative quantification was performed as in (40), on 8 biological samples per genotype for the  
183 E15, P1 and P7 groups, and on 6 biological samples for the E18 group. The mean quantitative  
184 cycle (Cq) values were extracted for each sample (genes of interest and housekeeping genes),  
185 and the mean Cq per gene was calculated within the control group (WT). A  $\Delta Cq$  was then  
186 calculated per sample by subtracting the control group average from the sample mean Cq. For  
187 each sample, the relative quantities were then calculated  $((1+E)^{\Delta Cq}, E=1)$ . Normalized  
188 expression per sample (genes of interest) was obtained by dividing the relative quantity of a  
189 given sample by the geometric mean of the relative quantities of the two housekeeping genes.  
190 The average normalized expression of the samples, in each genotype per gene of interest, was  
191 calculated.

192

193 ***Western blot***

194 Cerebellar tissue from E18 (n = 3 mice per genotype) and P7 (n = 5 mice per genotype), WT  
195 and *Tsc1*<sup>+/+</sup> mice, was dissected and immediately frozen in dry ice. Samples were homogenized  
196 with a Dounce homogenizer in ice-cold lysis buffer containing 50 mM Tris-HCl pH 8, 150 mM  
197 NaCl, 1% Triton X-100, 0.5% sodium deoxycholate, 0.1% SDS and protease inhibitor cocktail  
198 (Roche). Protein concentrations were measured using a Pierce BCA protein assay kit (Thermo  
199 Fisher). Samples were denatured and proteins separated in SDS-PAGE in Criterion™ TGX  
200 Stain-Free™ Gels (Bio-Rad), and transferred onto nitrocellulose membranes with the Trans-  
201 Blot® Turbo™ Blotting System (Bio-Rad).

202 Membranes were blocked with 5% BSA (Sigma-Aldrich) in Tris-buffered saline  
203 (TBS)-Tween (20 mM Tris-HCl pH7.5, 150 mM NaCl and 0.1%, Tween20) for 1h, and probed  
204 with the following primary antibodies: Pax2 (1:1000, rabbit, Cell Signaling 9666), Phospho-  
205 S6 Ribosomal Protein (Ser235/236) (1:1000, rabbit, Cell Signaling 2211), Ribosomal Protein

206 S6 (1:1000, mouse, Santa Cruz SC-74459) or GAPDH (1:1000, mouse, Cell Signaling 97166).  
207 Secondary antibodies used were goat anti-Rabbit Immunoglobulins/HRP (1:10000, Agilent  
208 Dako P0448) or goat anti-Mouse Immunoglobulins/HRP (1:10000, Agilent Dako P0447).  
209 Proteins were detected by the luminol-based enhanced chemiluminescence method  
210 (SuperSignal™ West Femto Maximum Sensitivity Substrate or SuperSignal™ West Dura  
211 Extended Duration Substrate, Thermo Fisher). Membranes were stripped with Restore™ PLUS  
212 Western Blot Stripping Buffer (Thermo Fisher). Densitometry of protein bands of interest was  
213 normalised to that of GAPDH using the Image Studio Lite software (LI-COR Biosciences).

214

### 215 *Immunohistochemistry*

216 After collection, E18 embryos (n = 3 mice per genotype) were fixed by immersion in cold 4%  
217 paraformaldehyde (PFA) in phosphate buffered saline (PBS). P7 pups (n = 3 per genotype)  
218 were injected with an overdose of pentobarbital and transcardially perfused with 4% PFA in  
219 PBS. Afterwards, tissue was placed in 4% PFA for 2 hours and transferred into 30% sucrose  
220 in 0.1 M phosphate buffer (PB) until embedding. Samples were embedded in 14% gelatine /  
221 30% sucrose and incubated in a 10% PFA / 30% sucrose solution for 1.5 h, at RT, on a shaker.  
222 Embedded samples were kept in 30% sucrose / 0.1M PB at 4°C until cut.

223 Cerebellar samples were cut in 30µm sagittal sections using a cryomicrotome (Leica  
224 SM 200R). Free-floating sections were rinsed with PBS and preincubated with 10% normal  
225 horse serum (NHS) / 0.5% Triton™ X-100 in PBS, for 1h at RT on a shaker. Sections were  
226 then incubated overnight, at 4°C, in 2% NHS / 0.4% Triton™ X-100 in PBS with primary  
227 antibodies against Pax2 (1:500, rabbit, Invitrogen 71-6000), Calbindin D28-K (1:10.000,  
228 mouse, Sigma C9848) or Parvalbumin (1:500, mouse, Swant 235). The following day, sections  
229 were rinsed with PBS and incubated with AlexaFluor 594 (1:500, Donkey anti-rabbit, Jackson  
230 711-585-152) and AlexaFluor 488 (1:500, Donkey anti-mouse, Jackson 715-545-150) in 2%

231 NHS / 0.4% Triton™ X-100 in PBS, for 1.5 h at RT. Sections were rinsed, counterstained with  
232 DAPI (1:10.000), and rinsed again with PB before mounting. Sections were imaged with a 10X  
233 (E18) or 20X (P7) objective using a Zeiss AxioImager.M2 microscope.

234

### 235 *Microscopy images quantification*

236 The number and area of Pax2<sup>+</sup> positive cells was automatically counted with Fiji ImageJ  
237 (41), using custom-written macros (<https://github.com/BaduraLab>). Given the positive  
238 correlation between nuclear and cell body size, we used the area of Pax2<sup>+</sup> staining as a proxy  
239 for cell area (42). To calculate the distance between Pax2<sup>+</sup> particles, we used the ND ImageJ  
240 plugin (43).

241 Calbindin-stained sections from P7 WT and *Tsc1*<sup>+/-</sup> mice were used to measure the area  
242 of Purkinje cells. The area of 10 randomly selected Purkinje cells per mouse, located between  
243 lobules V and VI, was manually measured with Fiji ImageJ, by drawing a region of interest  
244 around the visible cell body cross-section.

245 At P7, parvalbumin (PV) staining was still sparse and dispersed in the developing  
246 cerebellum. Thus, we opted for the measurement of the total area occupied by PV stain rather  
247 than counting individual cells. To do this, PV-stained cerebellar sections were automatically  
248 thresholded and a region of interest was defined including the whole cerebellar section while  
249 excluding the already existing Purkinje cell layer (see *Results*). This enabled the measurement  
250 of the PV-signal primarily derived from developing molecular layer interneurons (44).

251

### 252 *Statistics*

253 All statistical analysis was performed on GraphPad Prism 8. Data were first screened  
254 for the presence of outliers using the ROUT method, and tested for normality using the  
255 Shapiro–Wilk test, when applicable. When the normality assumption was followed, a two-

256 tailed t-test was used for data comparison. When this assumption was violated, a two-tailed  
257 Mann-Whitney test was used. Variable correlation was performed using Pearson's correlation,  
258 and simple linear regression was used for line fitting.

259

260

261

262

263

264

265

266

267

268

269

270

271

272

273

274

275

276

277

278

279

280

281 **Results**

282

283 **mTOR pathway and cerebellar cell type-specific gene transcription is dysregulated in**

284 ***Tsc1*<sup>+/-</sup> cerebella**

285 To first investigate whether *Tsc1* haploinsufficiency changes the expression of mTOR  
286 pathway and cerebellar genes in the developing cerebellum, we performed RT-qPCR in  
287 embryonic and early postnatal cerebellar tissue. Genetic transcription varies greatly during  
288 development, hindering the identification of housekeeping genes that remain stable across  
289 distinct developmental periods (36). Thus, based on available literature and inter-plate stability,  
290 we selected different housekeeping gene pairs for each time point analysed: *Sdha* and *Ywhaz*  
291 for E15, *Gusb* and *Sdha* for E18, and *Gusb* and *Ywhaz* for P1 and P7. Within each  
292 developmental time point, relative gene expression across the two genotypes, WT and *Tsc1*<sup>+/-</sup>,  
293 was compared.

294 Regarding the transcription of mTOR pathway genes, we found no differences between  
295 genotypes at E15, except for the expected down-regulation of *Tsc1* transcription ( $t(13) = 8.685$ ,  
296  $p < 0.000001$ ). At E18, in addition to *Tsc1* ( $t(10) = 9.320$ ,  $p = 0.000003$ ), also the transcription  
297 of *Tsc2* ( $t(10) = 2.389$ ,  $p = 0.038$ ), *Rictor* ( $t(9) = 2.521$ ,  $p = 0.033$ ) and *Mtor* ( $t(10) = 3.265$ ,  
298  $p = 0.009$ ) was down-regulated in *Tsc1*<sup>+/-</sup> cerebella, suggesting the presence of down-regulation  
299 mechanisms regarding mTOR complex genes. At P1, *Tsc1* ( $t(14) = 5.974$ ,  $p = 0.000034$ ) and  
300 *Rictor* ( $t(14) = 2.171$ ,  $p = 0.048$ ) were still down-regulated while, at P7, only *Tsc1* ( $t(14) =$   
301  $3.873$ ,  $p = 0.002$ ) and *Tsc2* ( $t(13) = 2.218$ ,  $p = 0.045$ ) were different from controls (**Figure**  
302 **1A**).

303 We then analysed the transcription of genes involved in the specification of distinct  
304 cerebellar cell types. No difference between genotypes was detected at E15 nor at P1. However,  
305 at E18, we found that both *Pax2* ( $t(10) = 2.867$ ,  $p = 0.017$ ), a marker for developing

306 interneurons, and *Slc1a3* ( $t(10) = 2.561$ ,  $p = 0.028$ ), a marker for Bergman glia, were down-  
307 regulated in *Tsc1*<sup>+/-</sup> cerebella, while an up-regulation of *Pax2* ( $t(13) = 2.642$ ,  $p = 0.020$ ) was  
308 detected in P7 *Tsc1*<sup>+/-</sup> cerebellar samples (**Figure 1B**). These data indicate that, although the  
309 mTOR pathway primarily undergoes post-translational regulation, during development, *Tsc1*<sup>+/-</sup>  
310 haploinsufficiency dysregulates a number of mTOR pathway-related genes, as well as the  
311 relative expression of *Slc1a3* and *Pax2*.



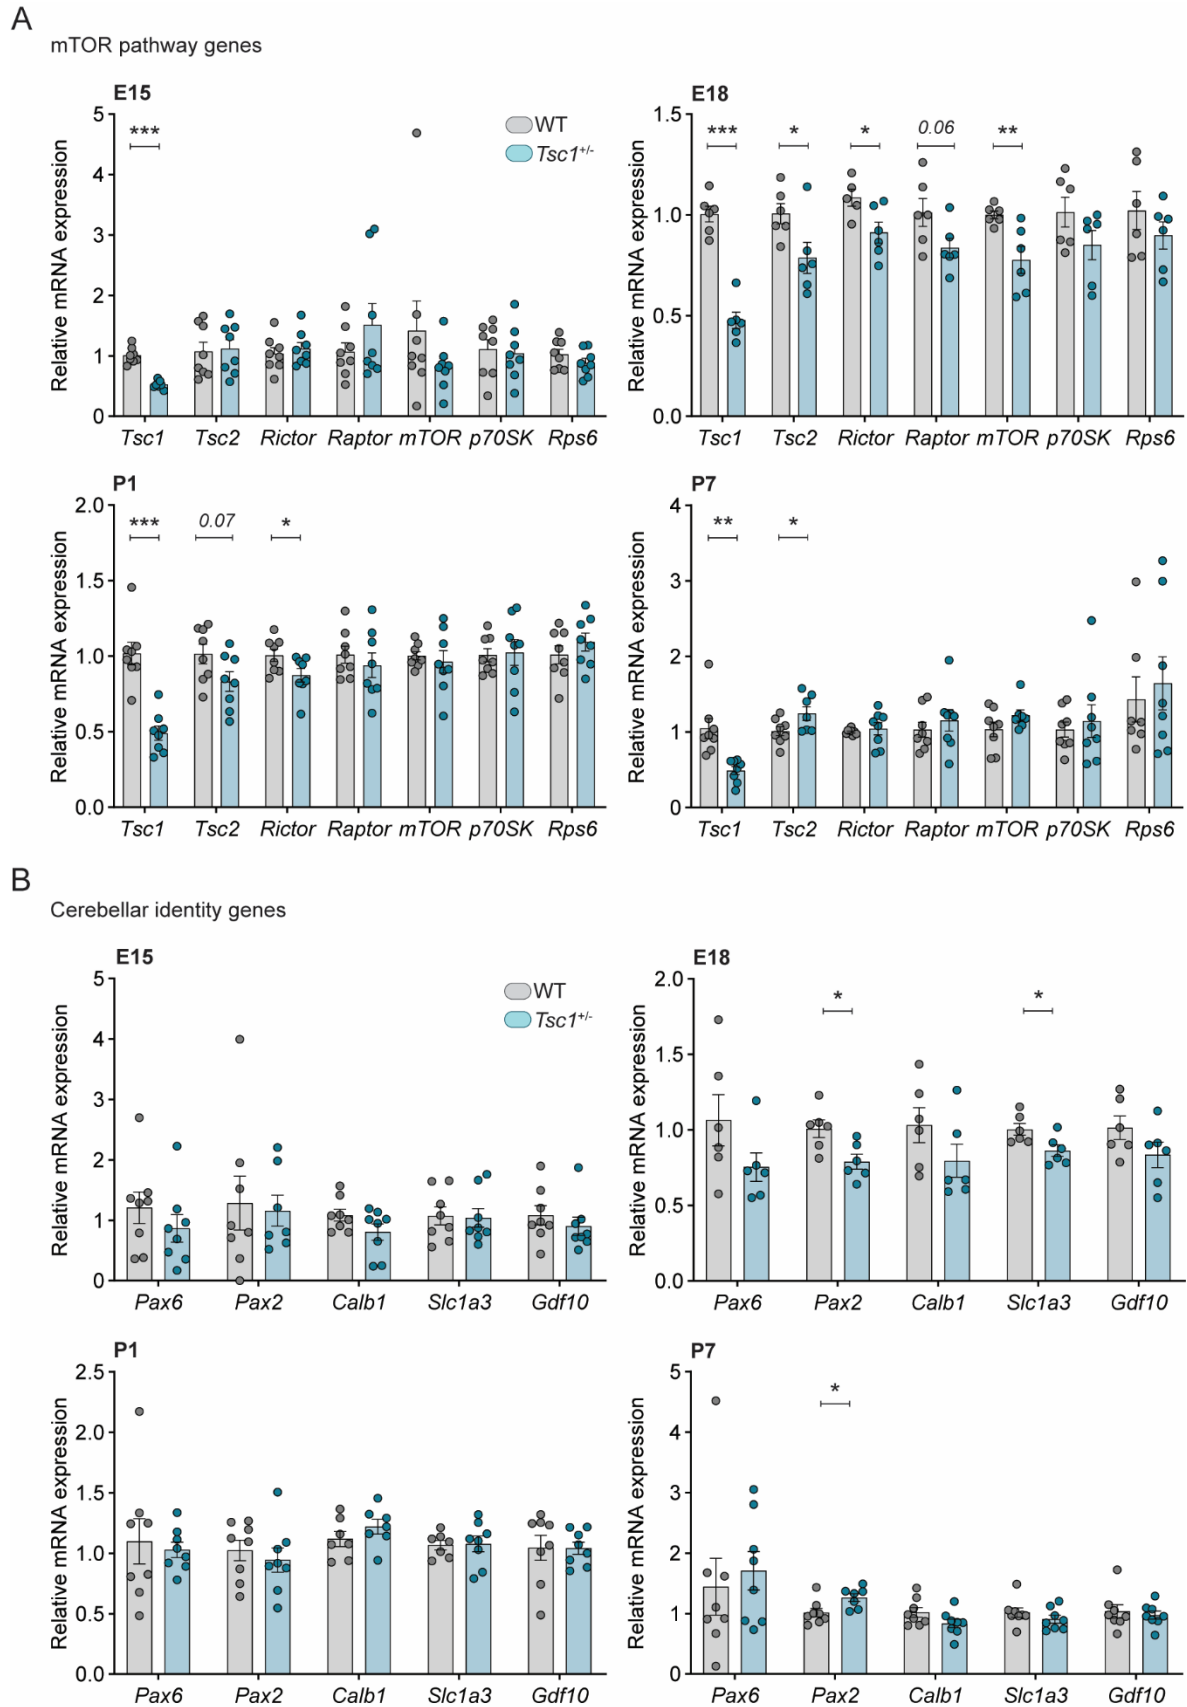

312

313 **Figure 1: Relative gene expression is altered in *Tsc1*<sup>+/-</sup> cerebella.** mRNA expression of mTOR

314 pathway genes (A) and cerebellar cell type-specific genes (B), relative to housekeeping genes. (A) A

315 switch in mTOR-related gene expression occurs at E18, a time point when most markers analysed were  
316 significantly down-regulated in *Tsc1*<sup>+/-</sup> cerebella. **(B)** Gene expression of cerebellar identity genes is  
317 relatively stable between genotypes, with the exception of *Pax2* and *Slc1a3*. *t*-test, \*  $p < 0.05$ , \*\*  $p <$   
318  $0.01$ , \*\*\*  $p < 0.001$ ;  $n = 8$  mice per genotype, except for E18, where  $n = 6$ .

319

## 320 ***Tsc1* haploinsufficiency leads to dysregulated gene interactions**

321         Given that E18 and P7 presented with the largest differences between WT and *Tsc1*<sup>+/-</sup>  
322 cerebellar gene expression, we focused on these two time points to evaluate the correlation  
323 between the relative expression of genes of interest. As expected, we found a significant  
324 positive correlation between the relative expression of *Tsc1* and *Tsc2* in WT cerebella (E18:  $r^2$   
325  $= 0.65$ ,  $p = 0.052$ ; P7:  $r^2 = 0.50$ ,  $p = 0.050$ ). While this correlation was still present in *Tsc1*<sup>+/-</sup>  
326 mice at E18 ( $r^2 = 0.91$ ,  $p = 0.003$ ), by P7 this relation was lost in mutants ( $r^2 = 0.03$ ,  $p = 0.718$ )  
327 **(Figure 2A)**. Additionally, while the relative expression of *Tsc1* in WT was negatively  
328 correlated with the relative expression of *S6* (E18:  $r^2 = 0.83$ ,  $p = 0.011$ ; P7:  $r^2 = 0.64$ ,  $p = 0.03$ ),  
329 this was not the case for *Tsc1*<sup>+/-</sup> mice (E18:  $r^2 = 0.01$ ,  $p = 0.82$ ; P7:  $r^2 = 0.03$ ,  $p = 0.71$ ) **(Figure**  
330 **2B)**. This indicates that genetic mTOR pathway dysregulation in *Tsc1*<sup>+/-</sup> cerebella can be found  
331 early in development, likely prior to detectable protein changes, and that these deficits exhibit  
332 time-dependent progression.

333         *Pax2* expression is initiated in inhibitory interneuronal precursors during their last  
334 mitosis (45). Possibly reflecting the positive role of the mTOR pathway on neuronal  
335 differentiation (46), we found a negative correlation between *Tsc1* and *Pax2* relative expression  
336 in E18 WT cerebella ( $r^2 = 0.74$ ,  $p = 0.03$ ). However, this correlation was absent in *Tsc1*<sup>+/-</sup> mice  
337 ( $r^2 = 0.22$ ,  $p = 0.35$ ) **(Figure 2C)**. This suggests that mTOR pathway disruption through *Tsc1*  
338 haploinsufficiency could lead to early dysfunction of *Pax2*<sup>+</sup> cell differentiation.

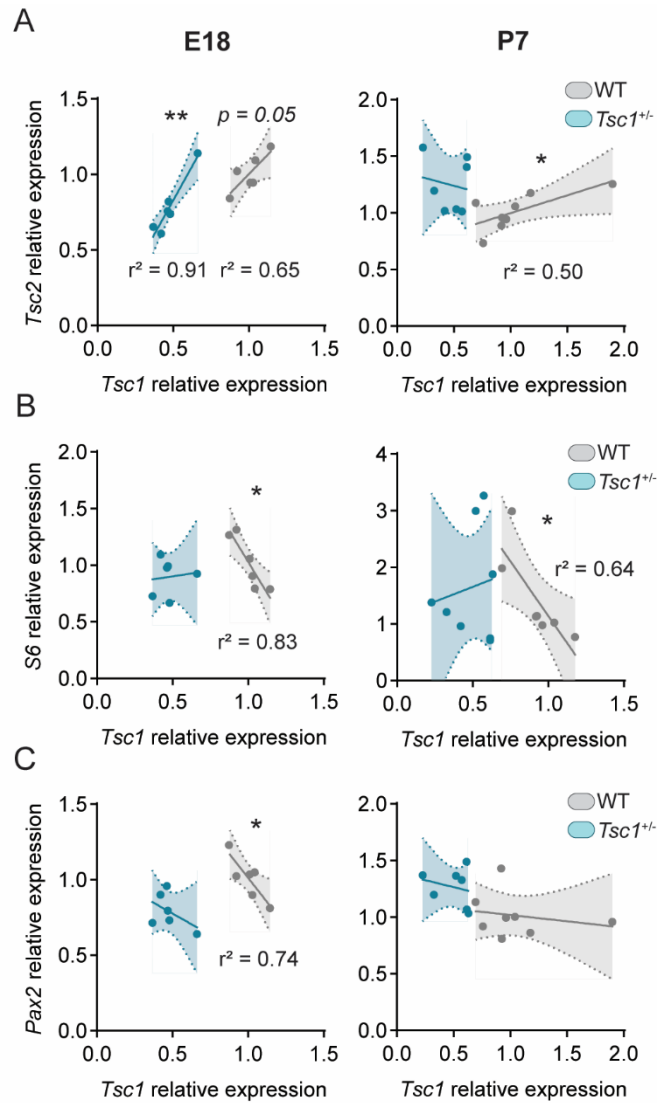

339

340 **Figure 2: Gene correlation is lost in *Tsc1*<sup>+/-</sup> cerebella.** Pearson's correlation plots for mRNA relative  
341 expression of *Tsc1* over (A) *Tsc2*, (B) *S6* and (C) *Pax2* in E18 (left column) and P7 (right column)  
342 cerebella. Pearson's correlation, \*  $p < 0.05$ , \*\*  $p < 0.01$ ;  $n = 8$  mice per genotype, except for E18, where  
343  $n = 6$ .

344

345 ***Tsc1* haploinsufficiency increases the size of *Pax2*<sup>+</sup> cells but does not affect cell number**  
346 **at E18**

347 The expression of *Pax2* in the cerebellum is initiated at around E13.5, primarily found  
348 in Golgi cells, and continues into postnatal time points, with the differentiation of stellate and  
349 basket cells perinatally (47–49). Having found that the relative mRNA expression of *Pax2* was

350 down-regulated in *Tsc1*<sup>+/-</sup> cerebella at E18, we then investigated the protein expression of Pax2  
351 at this time point. Using western blot in whole cerebellar extracts, we detected no differences  
352 between genotypes regarding the expression of Pax2 ( $U = 4, p > 0.99$ ) (**Figure 3A**).  
353 Correspondingly, we also found that WT and *Tsc1*<sup>+/-</sup> cerebella presented with a similar number  
354 of Pax2-positive (Pax2<sup>+</sup>) cells ( $U = 127.5, p = 0.16$ ) (**Figure 3B, C**).

355 At this stage, Pax2<sup>+</sup> cells are highly migratory and quasi-uniformly dispersed through  
356 the developing cerebellum (45). We corroborated this uniform positioning in both WT and  
357 *Tsc1*<sup>+/-</sup> sections as, in the two genotypes, the total number of Pax2<sup>+</sup> cells was positively  
358 correlated with the correspondent section size (WT:  $r^2 = 0.44, p = 0.005$ ; *Tsc1*<sup>+/-</sup>:  $r^2 = 0.36, p =$   
359  $0.003$ ) (**Figure 3D**). To investigate the position of these cells, we then calculated the nearest  
360 neighbour distance between Pax2<sup>+</sup> cells, and used this measure as a proxy for cell migration.  
361 We found that both WT and *Tsc1*<sup>+/-</sup> Pax2<sup>+</sup> cells were separated by similar distances ( $t(36) =$   
362  $0.26, p = 0.84$ ) (**Figure 3E**). This suggests that, while *Tsc1* haploinsufficiency causes a  
363 reduction in *Pax2* transcription, this is not sufficient to affect the generation nor migration of  
364 Pax2<sup>+</sup> cells at this stage in development.

365 Loss of function of *Tsc1*, and consequent mTOR overactivation, is often accompanied  
366 by changes in neuronal cell size (50). Thus, we then measured the size of Pax2<sup>+</sup> cells in the  
367 E18 cerebellum. Despite not finding increased overall levels of pS6 (Ser235/236)/total S6 in  
368 whole cerebellar extracts of *Tsc1*<sup>+/-</sup> mice ( $U = 4, p > 0.99$ ) (**Figure 3A**), we found that these  
369 mice presented with enlarged Pax2<sup>+</sup> cells when compared to WT cells ( $t(36) = 3.38, p = 0.002$ )  
370 (**Figure 3F**). These larger cells were present across the full spectrum of measured areas (**Figure**  
371 **3G**). This data suggests that the mTOR pathway is overactive in *Tsc1*<sup>+/-</sup> interneuronal  
372 progenitor cells, leading to an overall increase in cell size that seems to affect distinct lineages  
373 of inhibitory interneurons.

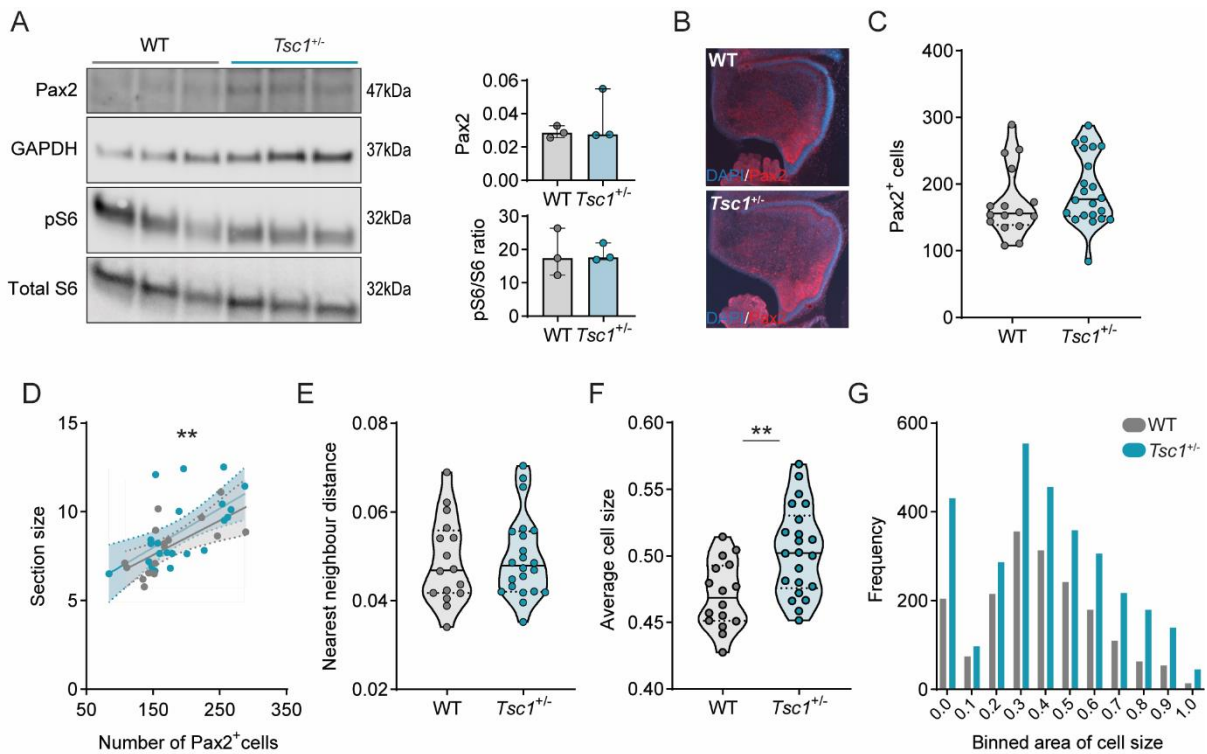

374

375 **Figure 3: Increased Pax2<sup>+</sup> cell size is found in E18 *Tsc1*<sup>+/-</sup> cerebella.** (A) Western blot quantification  
 376 of Pax2, phosphorylated S6 (Ser235/236) and total S6, in whole cerebellar tissue (n = 3 mice per  
 377 genotype, Mann-Whitney test). (B) Representative Pax2-stained sagittal section (red) counterstained  
 378 with DAPI (blue). (C) Pax2<sup>+</sup> cell count on WT (n = 16 sections from 2 mice) and *Tsc1*<sup>+/-</sup> (n = 22 sections  
 379 from 2 mice) sagittal sections (Mann-Whitney test). (D) Pearson's correlation between cerebellar  
 380 section size and the number of Pax2<sup>+</sup> cells (WT in grey, *Tsc1*<sup>+/-</sup> in blue; 16 points for WT and 22 for  
 381 *Tsc1*<sup>+/-</sup> mice). (E-F) Nearest neighbour distance and average cell size of WT and *Tsc1*<sup>+/-</sup> Pax2<sup>+</sup> cells (n  
 382 = 16 sections from 2 mice for WT and n = 22 sections from 2 mice for *Tsc1*<sup>+/-</sup>; *t*-test). (G) Frequency  
 383 of Pax2<sup>+</sup> cells over the binned cell area (2863 cells from WT and 4252 cells from *Tsc1*<sup>+/-</sup> mice). Area  
 384 in inches. \*\* *p* < 0.01.

385

386 **Overactive mTOR pathway in P7 cerebellum leads to perturbed interneuron**  
 387 **development in *Tsc1*<sup>+/-</sup> mice**

388

At P7, although the vast majority of cerebellar interneurons is already generated, these  
 389 can be found in distinct developmental stages, from migrating to fully mature neurons (49,51).

390 To further explore the increase in *Pax2* relative expression we previously found in *Tsc1*<sup>+/-</sup>  
391 cerebella at P7, we next analysed the expression and distribution of Pax2<sup>+</sup> cells in the P7  
392 cerebellum. As observed for the E18 cohort, we found no difference in Pax2 protein expression  
393 between WT and *Tsc1*<sup>+/-</sup> cerebella ( $t(8) = 1.61, p = 0.76$ ) (**Figure 4A**). Supporting our qPCR  
394 data, immunohistochemical analysis of Pax2-labelled cerebellar sections revealed that *Tsc1*<sup>+/-</sup>  
395 cerebella presented with an increased number Pax2<sup>+</sup> cells (**Figure 4B, C**). In addition, these  
396 cells were most abundant in the cerebellar white matter (**Figure 4B**), altogether suggesting the  
397 presence of an immature Pax2 phenotype in *Tsc1*<sup>+/-</sup> mice (52,53).

398 In contrast with the results obtained at E18, the size of Pax2<sup>+</sup> cells tended to be smaller  
399 in *Tsc1*<sup>+/-</sup> mice compared to WT ( $U = 2329, p = 0.08$ ) (**Figure 4D**). This putative Pax2<sup>+</sup> cell  
400 size change appeared to be specific towards Pax2<sup>+</sup> cells, as we found no difference in the size  
401 of other GABAergic cells, such as Purkinje cells ( $t(58) = 0.1219, p = 0.90$ ) (**Figure 4E, F**).  
402 This was an intriguing finding given that we detected an overall increase in pS6 (Ser235/236)  
403 / total S6 in whole cerebellar extracts, suggesting mTOR pathway hyperactivation (**Figure 4A**).  
404 Thus, we further investigated Pax2<sup>+</sup> cell size by analysing their frequency distribution across  
405 distinct binned areas. We found that *Tsc1*<sup>+/-</sup> mice presented with an increased number of small  
406 Pax2<sup>+</sup> cells (**Figure 4G**), which likely represent stellate and basket cells in the nascent  
407 molecular layer (45). Contrarily, *Tsc1*<sup>+/-</sup> mice exhibited decreased numbers of large Pax2<sup>+</sup> cells,  
408 indicative of the granular layer interneurons, Golgi cells (44,54) (**Figure 4H**). Furthermore,  
409 small Pax2<sup>+</sup> cells in *Tsc1*<sup>+/-</sup> mice were slightly smaller than WT cells (WT = 132 vs *Tsc1*<sup>+/-</sup> =  
410 123, median size,  $p < 0.0001$ ) (**Figure 4G-inset**), as were large the Pax2<sup>+</sup> cells (WT = 584 vs  
411 *Tsc1*<sup>+/-</sup> = 572 median size,  $p < 0.0001$ ) (**Figure 4H-inset**). This suggests that *Tsc1*  
412 haploinsufficiency differentially alters Pax2<sup>+</sup>-derived lineages.

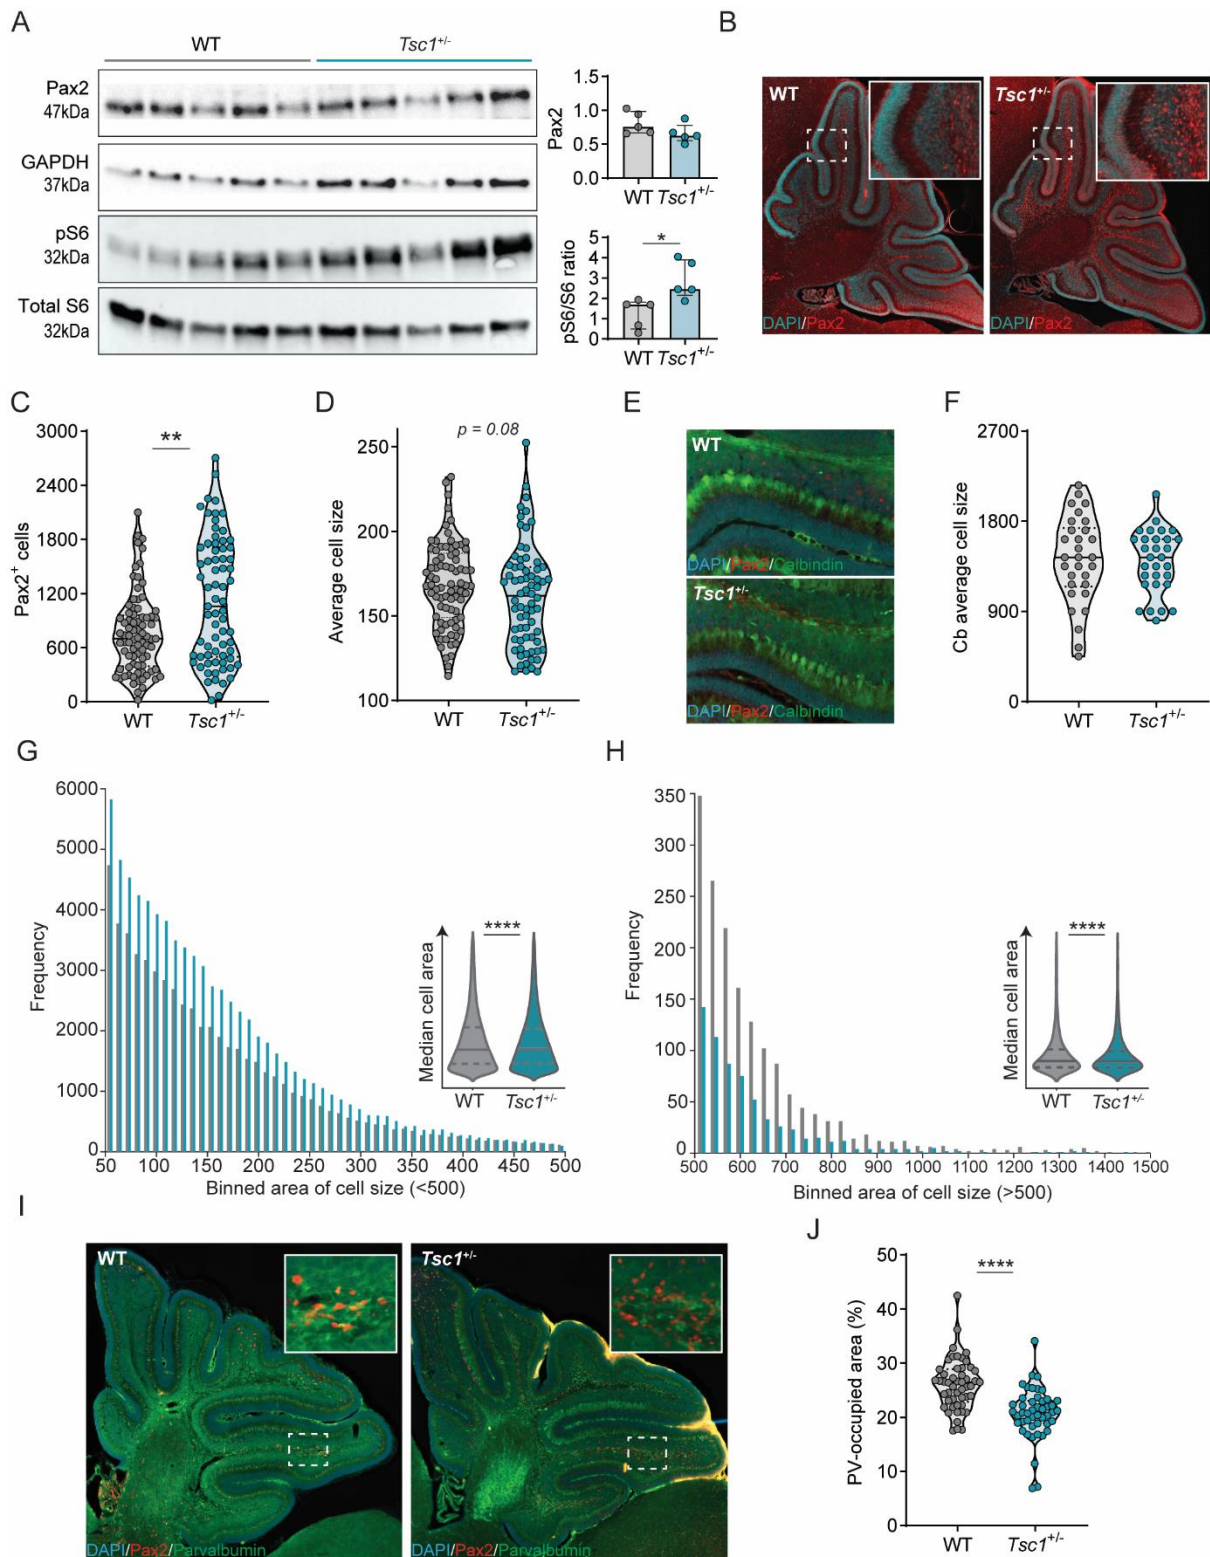

413

414 **Figure 4: *Tsc1<sup>+/-</sup>* mice present with interneuron development and maturation deficits at P7. (A)**

415 Western blot quantification of Pax2, phosphorylated S6 (Ser235/236) and total S6, in whole cerebellar

416 tissue (n = 5 mice per genotype; *t*-test). (B) Representative Pax2-stained sagittal section (red)

417 counterstained with DAPI (blue). (C) Pax2<sup>+</sup> cell count on WT (n = 81 sections from 3 mice) and *Tsc1<sup>+/-</sup>*

418 (n = 71 sections from 3 mice) sagittal sections (Mann-Whitney test). **(D)** Average cell size of WT and  
419 *Tsc1*<sup>+/-</sup> total Pax2<sup>+</sup> cells (n = 81 sections from 3 WT mice and n = 71 sections from 3 *Tsc1*<sup>+/-</sup> mice;  
420 Mann-Whitney test). **(E)** Representative sagittal section stained for Calbindin (green), Pax2 (red) and  
421 counterstained with DAPI (blue). **(F)** Average cell size of WT and *Tsc1*<sup>+/-</sup> Purkinje cells, measured  
422 between lobules V and VI (n = 10 cells per mouse, 3 mice per genotype; *t*-test). **(G-H)** Frequency of  
423 small (left) and large (right) Pax2<sup>+</sup> cells over binned cell area (61 189 cells from WT and 79 955 cells  
424 from *Tsc1*<sup>+/-</sup>, 3 mice per genotype). Insets show the median area of the measured cells. **(I)**  
425 Representative section stained for PV (green), Pax2 (red) and DAPI (blue) (Mann-Whitney test). **(J)**  
426 Percentage of PV-occupied area per section (n = 51 section from 3 WT mice and n = 49 sections from  
427 3 *Tsc1*<sup>+/-</sup> mice; Mann-Whitney test). Area in pixels. \* *p* < 0.05, \*\* *p* < 0.01, \*\*\* *p* < 0.001.

428

#### 429 **Maturation of interneuron precursors at P7 is altered in *Tsc1*<sup>+/-</sup> cerebella**

430 The density of cerebellar interneurons remains relatively constant between P5 to P10  
431 (55). For the majority of these cells, comprising mostly of the molecular layer interneurons,  
432 down-regulation of Pax2 is accompanied by up-regulation of PV, a process that marks  
433 interneuronal maturation (44,56). Given that we found an increase in the number of Pax2<sup>+</sup> cells  
434 in *Tsc1*<sup>+/-</sup> cerebella at P7 but not at E18, we speculated that this could reflect a decrease in Pax2  
435 down-regulation rather than an overall increase in cell generation. Therefore, we focused on  
436 the maturation of the interneuronal cells.

437 As a proxy of cell maturation, we quantified the percentage of cerebellar P7 area  
438 occupied by PV staining (*see methods*) (**Figure 4I**). We found that *Tsc1*<sup>+/-</sup> cerebellar sections  
439 presented with a decreased percentage of surface area labelled by PV staining when compared  
440 to WT mice (median percentage: 26.45% for WT vs 20.89% for *Tsc1*<sup>+/-</sup>, *p* < 0.0001), suggesting  
441 that *Tsc1* haploinsufficiency is accompanied by deficits in the maturation of molecular layer  
442 interneurons (**Figure 4J**).

443



## 444 Discussion

445

446 The mTOR pathway has been linked to many cellular and metabolic events, including  
447 cell replication, growth and biomass production (1). Although the mTOR kinase is known to  
448 be required for the formation of the central nervous system (CNS) (2,4), its precise role in the  
449 development of distinct cell lineages is not completely understood. Currently, a tight regulation  
450 of the timing of mTOR pathway activation appears to be essential for the balance between  
451 undifferentiated cell proliferation and cell differentiation. In postnatal mice, mTOR signalling  
452 is detected in proliferating neural stem cells (NSCs), while knockdown of its activity reduces  
453 proliferation. Conversely, increasing mTOR activation leads to a higher number of terminally  
454 differentiated NSCs at the expense of their renewal (4). Further, in cortical interneuron  
455 progenitors, deletion of mTOR decreases proliferation, leading to a reduction of mature  
456 calbindin-positive cells (57).

457 In the developing cerebellum, few reports have addressed the role of the mTOR  
458 pathway in the specification of distinct cell types. Proper mTOR signalling appears imperative  
459 for the correct development of Purkinje cells (PC), as disruptions in either mTORC1 or  
460 mTORC2 signalling in PC from E17.5 lead to smaller soma size and deficits in dendritic  
461 arborization (58,59). Conditional deletion of *Rictor*, essential for mTORC2 kinase activity,  
462 from all CNS precursor cells at E10.5, induces early postnatal changes to PC, including the  
463 emergence of several primary dendrites and abnormal vermal macrostructure (59).  
464 Furthermore, while the loss of *Rictor* does not seem to affect the development of cerebellar  
465 granule neuron precursor cells (GNP), deleting *Raptor*, necessary for mTORC1 activity, leads  
466 to a decrease in cell number (60). Additionally, increased S6 kinase activity leads to a reduction  
467 in proliferating GNP due to premature cell cycle exit (61).

468 To better understand how global mTOR overactivation impacts embryonic and early  
469 postnatal cerebellar development, we used *Tsc1*<sup>+/-</sup> mice, often used as a mouse model to study  
470 mTORopathy-associated ASD. Because the mTOR kinase is an important regulator of  
471 translation (1), we first evaluated expression levels of mTOR pathway-related and cerebellar  
472 cell-specific genes in the developing cerebellum. The overall loss of correlation in distinct gene  
473 pairs we found in *Tsc1*<sup>+/-</sup> mice supports a deficient stability of the TSC1-TSC2 complex, as  
474 well as a dysregulation of translational machinery. This is in line with previous work  
475 demonstrating that increased mTOR function leads to an altered profile in neuronal genetic  
476 transcription (62). Thus, *Tsc1*<sup>+/-</sup> haploinsufficiency alters the translational landscape of the  
477 cerebellum early in development, through the dysregulation of central mTOR-sensitive genes.

478 To identify which cell types could potentially be more susceptible to mTOR  
479 overactivation, we analysed the relative expression of cerebellar-specific cell markers in the  
480 developing cerebellum. We found cerebellar lineage deficits as early as E18, which were  
481 further evident in the first week of postnatal development. Specifically, we found that  
482 cerebellar interneuronal precursors, characterized by the expression of *Pax2*, seemed to be  
483 particularly sensitive to global haploinsufficiency of *Tsc1* and the consequent mTOR pathway  
484 overactivation. We observed that these interneuron precursors presented with hyperactive  
485 mTOR pathway. Additionally, this overactivation appeared to differentially affect the  
486 development of molecular and granular layer interneurons. The observed changes in *Pax2*  
487 mRNA expression indicate that *Tsc1* haploinsufficiency leads to a delay in the initiation of  
488 *Pax2* expression in embryonic development, causing its increased expression during later  
489 postnatal periods. Thus, it is possible that disruption of cerebellar mTOR signalling primarily  
490 affects the maturation of interneurons rather than progenitor cell pool maintenance.  
491 Alternatively, the deficient down-regulation of mTOR signalling found in P7 *Tsc1*<sup>+/-</sup> mice  
492 could also contribute to an increase in cell proliferation, leading to elevated overall numbers of

493 Pax2<sup>+</sup> cells. These are pertinent hypotheses, as recent work in *Drosophila* has demonstrated  
494 direct Pax2 expression modulation by the mTOR pathway (63). In *Drosophila*, D-Pax2 is a  
495 main regulator of cell fate in the developing eye (63), and was shown to physically interact  
496 with Unkempt (Unk), a highly conserved zinc finger/RING domain protein, which is also  
497 highly expressed in mouse cerebellum (64). In *Drosophila*, Unk expression is negatively  
498 regulated by the mTOR pathway and *Tsc1* mutant flies present with increased D-Pax2  
499 expression (63).

500         Using immunocytochemistry, we found deficits in molecular layer interneuron  
501 maturation, as evidenced by decreased PV staining in the cerebellum of *Tsc1*<sup>+/-</sup> P7 mice. PV is  
502 a calcium binding protein, abundant in Purkinje cells and cerebellar molecular layer  
503 interneurons (65). Thus, we focused on this population as they make up the majority of  
504 cerebellar interneuronal cells. During brain development, the initiation of PV expression  
505 coincides with the expression of a number of synaptogenesis markers, such as solute carrier  
506 family 32 and GABAA receptor  $\alpha 1$  subunit (44). Furthermore, the amount of PV expression  
507 was shown to determine presynaptic calcium dynamics in cerebellar interneurons, modulating  
508 neurotransmitter release (44). Thus, the changes in PV expression levels and timing of the  
509 interneuronal maturation that we found in *Tsc1*<sup>+/-</sup> mice, could potentially lead to deficits in  
510 synaptic integration in the cerebellum (66).

511         Behaviourally, *Tsc1* mice models present with ASD-like features, including decreased  
512 social interaction, increased repetitive behaviours and deficient reversal learning (29,31). This  
513 is a similar phenotype to the one found in PV knockout mice (67). Conversely, decreased  
514 numbers of PV positive cells are found in other models of ASD, namely *Cntnap2*<sup>-/-</sup>, *Shank1*<sup>-/-</sup>,  
515 *Shank3B*<sup>-/-</sup>, and *Brinp3*<sup>-/-</sup> (68–71). Based on this evidence, a recent review by Filice and  
516 colleagues proposed the “Parvalbumin Hypothesis of Autism Spectrum Disorder”, in which  
517 down-regulation of parvalbumin expression leads to altered neuronal function and abnormal

518 neurotransmitter release, in addition to increasing reactive oxygen species production and  
519 dendritic branching (72). Thus, deficits in PV could be one of the mechanisms integrating  
520 distinct high-risk mutations that lead to the development of ASD.

521

522

523

524

525

526

527

528

529

530

531

532

533

534

535

536

537

538

539

540

541

542

543 **Competing interests**

544 The authors declare no competing interests.

545

546 **Acknowledgments**

547 We thank Ype Elgersma for the total S6 antibody; Chris de Zeeuw for the Pax2 and S6  
548 antibodies; Roxanne ter Haar for the help in mouse genotyping and breeding; Elize Haasdijk  
549 and Ivy Hau for their help with immunohistochemistry tissue processing. This research was  
550 supported by the Netherlands Organization for Scientific Research and ZonMw  
551 (VIDI/917.18.380,2018; AB).

552

553 **Author contributions**

554 IS, AS, and AB designed the study and analysis. IS, AS and MRO performed the qPCR and  
555 histological experiments. CO executed the western blot experiments. IS, AS, MRO and CO  
556 analysed the data. CT, MS and AB supervised the project. IS, AS and AB wrote the first draft.  
557 All authors edited the manuscript.

558

559 **Data and code availability**

560 The raw data that support the findings of this study is available from the corresponding author  
561 upon request. The code is deposited at <https://github.com/BaduraLab>.

562

563

564

565

566

567

568 **References**

- 569 1. Liu, G. Y. & Sabatini, D. M. mTOR at the nexus of nutrition, growth, ageing and disease.  
570 *Nat. Rev. Mol. Cell Biol.* **21**, 183–203 (2020).
- 571 2. Ka, M., Condorelli, G., Woodgett, J. R. & Kim, W.-Y. mTOR regulates brain  
572 morphogenesis by mediating GSK3 signaling. *Development* **141**, 4076–4086 (2014).
- 573 3. Easley, C. A., 4th *et al.* mTOR-mediated activation of p70 S6K induces differentiation of  
574 pluripotent human embryonic stem cells. *Cell. Reprogram.* **12**, 263–273 (2010).
- 575 4. Hartman, N. W. *et al.* mTORC1 targets the translational repressor 4E-BP2, but not S6  
576 kinase 1/2, to regulate neural stem cell self-renewal in vivo. *Cell Rep.* **5**, 433–444 (2013).
- 577 5. Moloney, P. B., Cavalleri, G. L. & Delanty, N. Epilepsy in the mTORopathies:  
578 opportunities for precision medicine. *Brain Commun* **3**, fcab222 (2021).
- 579 6. Nguyen, L. H. & Bordey, A. Corrigendum: Convergent and Divergent Mechanisms of  
580 Epileptogenesis in mTORopathies. *Front. Neuroanat.* **15**, 715363 (2021).
- 581 7. Haines, J. L. *et al.* Localization of one gene for tuberous sclerosis within 9q32-9q34, and  
582 further evidence for heterogeneity. *Am. J. Hum. Genet.* **49**, 764–772 (1991).
- 583 8. Northrup, H. *et al.* Evidence for genetic heterogeneity in tuberous sclerosis: one locus on  
584 chromosome 9 and at least one locus elsewhere. *Am. J. Hum. Genet.* **51**, 709–720 (1992).
- 585 9. Qin, J. *et al.* Structural Basis of the Interaction between Tuberous Sclerosis Complex 1  
586 (TSC1) and Tre2-Bub2-Cdc16 Domain Family Member 7 (TBC1D7). *J. Biol. Chem.* **291**,  
587 8591–8601 (2016).
- 588 10. Crino, P. B. Evolving neurobiology of tuberous sclerosis complex. *Acta Neuropathol.* **125**,  
589 317–332 (2013).
- 590 11. Sarbassov, D. D. *et al.* Rictor, a novel binding partner of mTOR, defines a rapamycin-  
591 insensitive and raptor-independent pathway that regulates the cytoskeleton. *Curr. Biol.*  
592 **14**, 1296–1302 (2004).

- 593 12. Kim, D.-H. *et al.* mTOR interacts with raptor to form a nutrient-sensitive complex that  
594 signals to the cell growth machinery. *Cell* **110**, 163–175 (2002).
- 595 13. Masri, J. *et al.* mTORC2 activity is elevated in gliomas and promotes growth and cell  
596 motility via overexpression of rictor. *Cancer Res.* **67**, 11712–11720 (2007).
- 597 14. Hoxhaj, G. *et al.* The mTORC1 Signaling Network Senses Changes in Cellular Purine  
598 Nucleotide Levels. *Cell Rep.* **21**, 1331–1346 (2017).
- 599 15. McCabe, M. P. *et al.* Genetic inactivation of mTORC1 or mTORC2 in neurons reveals  
600 distinct functions in glutamatergic synaptic transmission. *Elife* **9**, (2020).
- 601 16. McDonald, N. M. *et al.* Early autism symptoms in infants with tuberous sclerosis  
602 complex. *Autism Res.* **10**, 1981–1990 (2017).
- 603 17. Kingswood, J. C. *et al.* Tuberous Sclerosis registry to increase disease Awareness  
604 (TOSCA) - baseline data on 2093 patients. *Orphanet J. Rare Dis.* **12**, 2 (2017).
- 605 18. American Psychiatric Association. *Diagnostic and Statistical Manual of Mental*  
606 *Disorders: DSM-5TM*. (American Psychiatric Association, 1980).
- 607 19. Elsabbagh, M. *et al.* Global prevalence of autism and other pervasive developmental  
608 disorders. *Autism Res.* **5**, 160–179 (2012).
- 609 20. Hsu, L. C.-L. *et al.* Lhx2 regulates the timing of  $\beta$ -catenin-dependent cortical  
610 neurogenesis. *Proc. Natl. Acad. Sci. U. S. A.* **112**, 12199–12204 (2015).
- 611 21. La Fata, G. *et al.* FMRP regulates multipolar to bipolar transition affecting neuronal  
612 migration and cortical circuitry. *Nat. Neurosci.* **17**, 1693–1700 (2014).
- 613 22. Selby, L., Zhang, C. & Sun, Q.-Q. Major defects in neocortical GABAergic inhibitory  
614 circuits in mice lacking the fragile X mental retardation protein. *Neurosci. Lett.* **412**, 227–  
615 232 (2007).
- 616 23. Wang, S. S.-H., Kloth, A. D. & Badura, A. The cerebellum, sensitive periods, and autism.  
617 *Neuron* **83**, 518–532 (2014).

- 618 24. Limperopoulos, C. *et al.* Does cerebellar injury in premature infants contribute to the high  
619 prevalence of long-term cognitive, learning, and behavioral disability in survivors?  
620 *Pediatrics* **120**, 584–593 (2007).
- 621 25. van der Heijden, M. E., Gill, J. S. & Sillitoe, R. V. Abnormal Cerebellar Development in  
622 Autism Spectrum Disorders. *Dev. Neurosci.* **43**, 181–190 (2021).
- 623 26. Kelly, E. *et al.* Regulation of autism-relevant behaviors by cerebellar-prefrontal cortical  
624 circuits. *Nat. Neurosci.* **23**, 1102–1110 (2020).
- 625 27. Stoodley, C. J. *et al.* Altered cerebellar connectivity in autism and cerebellar-mediated  
626 rescue of autism-related behaviors in mice. *Nat. Neurosci.* **20**, 1744–1751 (2017).
- 627 28. Badura, A. *et al.* Normal cognitive and social development require posterior cerebellar  
628 activity. *Elife* **7**, (2018).
- 629 29. Tsai, P. T. *et al.* Autistic-like behaviour and cerebellar dysfunction in Purkinje cell Tsc1  
630 mutant mice. *Nature* **488**, 647–651 (2012).
- 631 30. Tsai, P. T. *et al.* Sensitive Periods for Cerebellar-Mediated Autistic-like Behaviors. *Cell*  
632 *Rep.* **25**, 357–367.e4 (2018).
- 633 31. Goorden, S. M. I., van Woerden, G. M., van der Weerd, L., Cheadle, J. P. & Elgersma, Y.  
634 Cognitive deficits in Tsc1<sup>+/-</sup> mice in the absence of cerebral lesions and seizures. *Ann.*  
635 *Neurol.* **62**, 648–655 (2007).
- 636 32. Menashe, I., Grange, P., Larsen, E. C., Banerjee-Basu, S. & Mitra, P. P. Co-expression  
637 profiling of autism genes in the mouse brain. *PLoS Comput. Biol.* **9**, e1003128 (2013).
- 638 33. Li, Y. *et al.* Regionally specific TSC1 and TSC2 gene expression in tuberous sclerosis  
639 complex. *Sci. Rep.* **8**, 13373 (2018).
- 640 34. Kwiatkowski, D. J. *et al.* A mouse model of TSC1 reveals sex-dependent lethality from  
641 liver hemangiomas, and up-regulation of p70S6 kinase activity in Tsc1 null cells. *Hum.*  
642 *Mol. Genet.* **11**, 525–534 (2002).



- 643 35. Carter, R. A. *et al.* A Single-Cell Transcriptional Atlas of the Developing Murine  
644 Cerebellum. *Curr. Biol.* **28**, 2910–2920.e2 (2018).
- 645 36. Xu, D. *et al.* Identifying suitable reference genes for developing and injured mouse CNS  
646 tissues. *Dev. Neurobiol.* **78**, 39–50 (2018).
- 647 37. Cheung, T. T., Weston, M. K. & Wilson, M. J. Selection and evaluation of reference genes  
648 for analysis of mouse (*Mus musculus*) sex-dimorphic brain development. *PeerJ* **5**, e2909  
649 (2017).
- 650 38. Shaydurov, V. A., Kasianov, A. & Bolshakov, A. P. Analysis of Housekeeping Genes for  
651 Accurate Normalization of qPCR Data During Early Postnatal Brain Development. *J.*  
652 *Mol. Neurosci.* **64**, 431–439 (2018).
- 653 39. Rio, D. C., Ares, M., Jr, Hannon, G. J. & Nilsen, T. W. Purification of RNA using TRIzol  
654 (TRI reagent). *Cold Spring Harb. Protoc.* **2010**, db.prot5439 (2010).
- 655 40. Taylor, S. C. *et al.* The Ultimate qPCR Experiment: Producing Publication Quality,  
656 Reproducible Data the First Time. *Trends Biotechnol.* **37**, 761–774 (2019).
- 657 41. Schindelin, J. *et al.* Fiji: an open-source platform for biological-image analysis. *Nat.*  
658 *Methods* **9**, 676–682 (2012).
- 659 42. Wu, Y., Janmey, P. & Sun, S. X. The Correlation Between Cell and Nucleus Size is  
660 Explained by an Eukaryotic Cell Growth Model. *bioRxiv* 2021.09.01.458491 (2021).  
661 doi:10.1101/2021.09.01.458491
- 662 43. Haeri, M. & Haeri, M. ImageJ plugin for analysis of porous scaffolds used in tissue  
663 engineering. *J. Open Res. Softw.* **3**, (2015).
- 664 44. Simat, M., Ambrosetti, L., Lardi-Studler, B. & Fritschy, J.-M. GABAergic synaptogenesis  
665 marks the onset of differentiation of basket and stellate cells in mouse cerebellum. *Eur. J.*  
666 *Neurosci.* **26**, 2239–2256 (2007).
- 667 45. Maricich, S. M. & Herrup, K. Pax-2 expression defines a subset of GABAergic

- 668 interneurons and their precursors in the developing murine cerebellum. *J. Neurobiol.* **41**,  
669 281–294 (1999).
- 670 46. Lee, J. E., Lim, M. S., Park, J. H., Park, C. H. & Koh, H. C. S6K Promotes Dopaminergic  
671 Neuronal Differentiation Through PI3K/Akt/mTOR-Dependent Signaling Pathways in  
672 Human Neural Stem Cells. *Mol. Neurobiol.* **53**, 3771–3782 (2016).
- 673 47. Brown, A. M. *et al.* Molecular layer interneurons shape the spike activity of cerebellar  
674 Purkinje cells. *Sci. Rep.* **9**, 1742 (2019).
- 675 48. Hoshino, M. Neuronal subtype specification in the cerebellum and dorsal hindbrain. *Dev.*  
676 *Growth Differ.* **54**, 317–326 (2012).
- 677 49. Leto, K., Carletti, B., Williams, I. M., Magrassi, L. & Rossi, F. Different types of  
678 cerebellar GABAergic interneurons originate from a common pool of multipotent  
679 progenitor cells. *J. Neurosci.* **26**, 11682–11694 (2006).
- 680 50. Tavazoie, S. F., Alvarez, V. A., Ridenour, D. A., Kwiatkowski, D. J. & Sabatini, B. L.  
681 Regulation of neuronal morphology and function by the tumor suppressors Tsc1 and Tsc2.  
682 *Nat. Neurosci.* **8**, 1727–1734 (2005).
- 683 51. Glassmann, A. *et al.* Basic molecular fingerprinting of immature cerebellar cortical  
684 inhibitory interneurons and their precursors. *Neuroscience* **159**, 69–82 (2009).
- 685 52. Zhang, L. & Goldman, J. E. Generation of cerebellar interneurons from dividing  
686 progenitors in white matter. *Neuron* **16**, 47–54 (1996).
- 687 53. Groteklaes, A., Bönisch, C., Eiberger, B., Christ, A. & Schilling, K. Developmental  
688 Maturation of the Cerebellar White Matter-an Instructive Environment for Cerebellar  
689 Inhibitory Interneurons. *Cerebellum* **19**, 286–308 (2020).
- 690 54. Ruigrok, T. J. H., Hensbroek, R. A. & Simpson, J. I. Spontaneous activity signatures of  
691 morphologically identified interneurons in the vestibulocerebellum. *J. Neurosci.* **31**, 712–  
692 724 (2011).

- 693 55. Yamanaka, H., Yanagawa, Y. & Obata, K. Development of stellate and basket cells and  
694 their apoptosis in mouse cerebellar cortex. *Neurosci. Res.* **50**, 13–22 (2004).
- 695 56. Grimaldi, P., Parras, C., Guillemot, F., Rossi, F. & Wassef, M. Origins and control of the  
696 differentiation of inhibitory interneurons and glia in the cerebellum. *Dev. Biol.* **328**, 422–  
697 433 (2009).
- 698 57. Ka, M., Smith, A. L. & Kim, W.-Y. mTOR controls genesis and autophagy of GABAergic  
699 interneurons during brain development. *Autophagy* **13**, 1348–1363 (2017).
- 700 58. Angliker, N., Burri, M., Zaichuk, M., Fritschy, J.-M. & Rüegg, M. A. mTORC1 and  
701 mTORC2 have largely distinct functions in Purkinje cells. *Eur. J. Neurosci.* **42**, 2595–  
702 2612 (2015).
- 703 59. Thomanetz, V. *et al.* Ablation of the mTORC2 component rictor in brain or Purkinje cells  
704 affects size and neuron morphology. *J. Cell Biol.* **201**, 293–308 (2013).
- 705 60. Wu, C.-C. *et al.* mTORC1-Mediated Inhibition of 4EBP1 Is Essential for Hedgehog  
706 Signaling-Driven Translation and Medulloblastoma. *Dev. Cell* **43**, 673–688.e5 (2017).
- 707 61. Mainwaring, L. A. & Kenney, A. M. Divergent functions for eIF4E and S6 kinase by  
708 sonic hedgehog mitogenic signaling in the developing cerebellum. *Oncogene* **30**, 1784–  
709 1797 (2011).
- 710 62. Kim, J. K. *et al.* Brain somatic mutations in MTOR reveal translational dysregulations  
711 underlying intractable focal epilepsy. *J. Clin. Invest.* **129**, 4207–4223 (2019).
- 712 63. Avet-Rochex, A. *et al.* Unkempt is negatively regulated by mTOR and uncouples neuronal  
713 differentiation from growth control. *PLoS Genet.* **10**, e1004624 (2014).
- 714 64. Vinsland, E. *et al.* The zinc finger/RING domain protein Unkempt regulates cognitive  
715 flexibility. *Sci. Rep.* **11**, 16299 (2021).
- 716 65. Kosaka, T., Kosaka, K., Nakayama, T., Hunziker, W. & Heizmann, C. W. Axons and axon  
717 terminals of cerebellar Purkinje cells and basket cells have higher levels of parvalbumin

- 718 immunoreactivity than somata and dendrites: quantitative analysis by immunogold  
719 labeling. *Exp. Brain Res.* **93**, 483–491 (1993).
- 720 66. Caillard, O. *et al.* Role of the calcium-binding protein parvalbumin in short-term synaptic  
721 plasticity. *Proc. Natl. Acad. Sci. U. S. A.* **97**, 13372–13377 (2000).
- 722 67. Wöhr, M. *et al.* Lack of parvalbumin in mice leads to behavioral deficits relevant to all  
723 human autism core symptoms and related neural morphofunctional abnormalities. *Transl.*  
724 *Psychiatry* **5**, e525 (2015).
- 725 68. Lauber, E., Filice, F. & Schwaller, B. Dysregulation of Parvalbumin Expression in the  
726 *Cntnap2*<sup>-/-</sup> Mouse Model of Autism Spectrum Disorder. *Front. Mol. Neurosci.* **11**, 262  
727 (2018).
- 728 69. Filice, F., Vörckel, K. J., Sungur, A. Ö., Wöhr, M. & Schwaller, B. Reduction in  
729 parvalbumin expression not loss of the parvalbumin-expressing GABA interneuron  
730 subpopulation in genetic parvalbumin and shank mouse models of autism. *Mol. Brain* **9**,  
731 10 (2016).
- 732 70. Schmitz-Abe, K. *et al.* Homozygous deletions implicate non-coding epigenetic marks in  
733 Autism spectrum disorder. *Sci. Rep.* **10**, 14045 (2020).
- 734 71. Kobayashi, M., Hayashi, Y., Fujimoto, Y. & Matsuoka, I. Decreased parvalbumin and  
735 somatostatin neurons in medial prefrontal cortex in BRINP1-KO mice. *Neurosci. Lett.*  
736 **683**, 82–88 (2018).
- 737 72. Filice, F., Janickova, L., Henzi, T., Bilella, A. & Schwaller, B. The Parvalbumin  
738 Hypothesis of Autism Spectrum Disorder. *Front. Cell. Neurosci.* **14**, 577525 (2020).
